# Supplementary material for: Revealing Genetic Diversity in the Rice Breeding Lines (Oryza sativa x O. rufipogon) Based on Whole Genome Sequencing Variants (SNPs/InDels)
Source: Research Square preprint supplement (doi:10.21203/rs.3.rs-8630035/v1), 2026-02-19
Supplement: Supplementary file 1 [file f1611608701152aeeb95f874.docx]

**Supplementary file**

**Revealing Genetic Diversity in the Rice Breeding Lines (*Oryza sativa* x *O. rufipogon*) Based on Whole Genome Sequencing Variants (SNPs/InDels)**

Shukdeb Sarkar, Jayita Sarkar, Bhumika T. Yonzon, Pankaj Shil, and Subhas Chandra Roy*

Plant Genetics & Molecular Breeding Laboratory, Department of Botany, University of North Bengal, Siliguri-734013, India

*Correspondence:**[subhascr2011@gmail.com](mailto:subhascr2011@gmail.com)**

**Supplementary Table 1: Description of the libraries**

| **Sl. No.** | **Sample ID** | **Qubit Conc. (ng/ul)** | **Vol (ul)** | **Yield (ng)** | **Barcode 1** | **Index Sequence 1** | **Barcode 2** | **Index Se-quence 2** |
| --- | --- | --- | --- | --- | --- | --- | --- | --- |
| 1 | Yamuna | 25.2 | 10 | 252 | 244 | TCTGTTCTCG | 244 | CGTGAATCGC |
| 2 | Wild Rice | 22.6 | 10 | 226 | 245 | GATACTTCAC | 245 | GAGCAGCCTT |
| 3 | YR 13 | 21.6 | 10 | 216 | 246 | AGTGCTGATA | 246 | TCGATTACCA |
| 4 | YR 32 | 20.4 | 10 | 204 | 247 | ATCCTTCGGT | 247 | CAGTCCAATT |

| **Supplementary Table 2:Number of changes by type for Wild rice, Yamuna, YR13 and YR32** | | | | | |
| --- | --- | --- | --- | --- | --- |
| **Type** |  | **Wild** | **Yamuna** | **YR13** | **YR32** |
| **SNP** | Total - | 399570 | 540839 | 1209121 | 781711 |
| Homo - | 59501 | 190208 | 168522 | 101420 |
| Hetero - | 340069 | 350631 | 1040599 | 680291 |
| **MNP** | Total - | 223 | 289 | 486 | 313 |
| Homo - | 0 | 0 | 0 | 0 |
| Hetero - | 223 | 289 | 486 | 313 |
| **INS** | Total - | 24576 | 32704 | 87218 | 52324 |
| Homo - | 3852 | 13627 | 11021 | 6472 |
| Hetero - | 20724 | 19077 | 76197 | 45852 |
| **DEL** | Total - | 28441 | 35864 | 97076 | 60318 |
| Homo - | 3160 | 12962 | 9713 | 5783 |
| Hetero - | 25281 | 22902 | 87363 | 54535 |
| **Total** | **Homo** | **66,513** | **216,797** | **189,256** | **113,675** |
| **Hetero** | **386,297** | **392,899** | **1,204,645** | **780,991** |
| **Grand Total** | **452,810** | **609,696** | **1,393,901** | **894,666** |

**SNP: Single Nucleotide Polymorphism, MNP: Multiple Nucleotide Polymorphism, INS: Insertion and DEL: Deletion**

| **Supplementary Table 3: Ts/Tv (Transitions/Transversions) for Wild rice, Yamuna, YR13 and YR32** | | | | |
| --- | --- | --- | --- | --- |
| **Type** | Wild | Yamuna | YR13 | YR32 |
| **Transitions (Ts)** | 283790 | 386213 | 857297 | 556506 |
| **Transversions (Tv)** | 115780 | 154626 | 351824 | 225205 |
| **Ts/Tv ratio** | 2.451 | 2.497 | 2.436 | 2.471 |

| **Supplementary Table 4: Number of effects by type and region for Wild rice, Yamuna, YR13 and YR32** | | | | | |
| --- | --- | --- | --- | --- | --- |
| **Type** |  | Wild | Yamuna | YR13 | YR32 |
| **Downstream -** | Count - | 389537 | 523212 | 1226174 | 782875 |
| Percent - | 30.80% | 30.76% | 30.74% | 30.80% |
| **Exon -** | Count - | 121445 | 163948 | 312616 | 218705 |
| Percent - | 9.60% | 9.64% | 7.84% | 8.60% |
| **Intergenic -** | Count - | 249488 | 339580 | 820794 | 509396 |
| Percent - | 19.73% | 19.97% | 20.58% | 20.04% |
| **Intron -** | Count - | 92642 | 122218 | 303952 | 191388 |
| Percent - | 7.32% | 7.19% | 7.62% | 7.53% |
| **Splice site acceptor -** | Count - | 326 | 492 | 984 | 668 |
| Percent - | 0.03% | 0.03% | 0.03% | 0.03% |
| **Splice site donar -** | Count - | 325 | 474 | 947 | 684 |
| Percent - | 0.03% | 0.03% | 0.02% | 0.03% |
| **Upstream -** | Count - | 392064 | 528569 | 1258710 | 798521 |
| Percent - | 31.00% | 31.08% | 31.56% | 31.41% |
| **UTR 3 Prime -** | Count - | 12000 | 13888 | 41906 | 25701 |
| Percent - | 0.95% | 0.82% | 1.05% | 1.01% |
| **UTR 5 Prime -** | Count - | 7009 | 8442 | 22744 | 14025 |
| Percent - | 0.55% | 0.50% | 0.57% | 0.55% |

| **Supplementary Table 5: Number of effects by impact for Wild rice, Yamuna, YR13 and YR32** | | | | | |
| --- | --- | --- | --- | --- | --- |
| **Type** |  | Wild | Yamuna | YR13 | YR32 |
| **High-** | Count - | 7765 | 11340 | 21107 | 14675 |
| Percent - | 0.61% | 0.67% | 0.53% | 0.58% |
| **Low-** | Count - | 53722 | 70592 | 131643 | 93430 |
| Percent - | 4.25% | 4.15% | 3.30% | 3.68% |
| **Moderate -** | Count - | 61499 | 84077 | 164422 | 113678 |
| Percent - | 4.86% | 4.94% | 4.12% | 4.47% |
| **Modifier-** | Count - | 1141865 | 1534830 | 3671713 | 2320234 |
| Percent - | 90.28% | 90.24% | 92.05% | 91.28% |

| **Supplementary Table 6: Number of effects by functional class for Wild rice, Yamuna, YR13 and YR32** | | | | | |
| --- | --- | --- | --- | --- | --- |
| **Type** |  | Wild | Yamuna | YR13 | YR32 |
| **Missense -** | Count - | 59948 | 82065 | 159415 | 110461 |
| Percent - | 52.01% | 52.90% | 54.11% | 53.43% |
| **Nonsense -** | Count - | 2522 | 3603 | 6248 | 4601 |
| Percent - | 2.19% | 2.32% | 2.12% | 2.23% |
| **Silent -** | Count - | 52804 | 69465 | 128965 | 91682 |
| Percent - | 45.81% | 44.78% | 43.77% | 44.35% |

| Supplementary Table 7: Gene of interest having significant SNPs | | | | | | | | | | | | | |
| --- | --- | --- | --- | --- | --- | --- | --- | --- | --- | --- | --- | --- | --- |
| WILD rice |  |  |  |  |  |  |  |  |  |  |  |  |  |
| **Chrom** | **Position** | **Reference** | **Variant** | **Type** | **Zygosity** | **Gene_ID** | **Effect** | **old_AA/new_AA** | **Old_codon/New_codon** | **Codon_Num(CDS)** | **Genes** | **Trait** | **Gene/QTL** |
| 1 | 38385057 | A | G | SNP | Hom | LOC_Os01g66100 | NON_SYNONYMOUS_CODING | Q/R | cAg/cGg | 340 | Os01g0883800 | Plant height | sd1 |
| 7 | 2839810 | C | A | SNP | Het | LOC_Os07g05900 | NON_SYNONYMOUS_CODING | R/L | cGc/cTc | 57 | Os07g0153600 | Prostrate growth | PROG1 |
| 7 | 2839811 | G | C | SNP | Het | LOC_Os07g05900 | NON_SYNONYMOUS_CODING | R/G | Cgc/Ggc | 57 | Os07g0153600 | Prostrate growth | PROG1 |
| 7 | 2839819 | T | C | SNP | Het | LOC_Os07g05900 | NON_SYNONYMOUS_CODING | K/R | aAg/aGg | 54 | Os07g0153600 | Prostrate growth | PROG1 |
| 7 | 2839821 | G | C | SNP | Het | LOC_Os07g05900 | SYNONYMOUS_CODING | A/A | gcC/gcG | 53 | Os07g0153600 | Prostrate growth | PROG1 |
| 7 | 2839822 | G | T | SNP | Het | LOC_Os07g05900 | NON_SYNONYMOUS_CODING | A/D | gCc/gAc | 53 | Os07g0153600 | Prostrate growth | PROG1 |
| YAMUNA |  |  |  |  |  |  |  |  |  |  |  |  |  |
| **Chrom** | **Position** | **Reference** | **Variant** | **Type** | **Zygosity** | **Gene_ID** | **Effect** | **old_AA/new_AA** | **Old_codon/New_codon** | **Codon_Num(CDS)** | **Genes** |  |  |
| 4 | 33073259 | C | T | SNP | Het | LOC_Os04g55560 | NON_SYNONYMOUS_CODING | R/W | Cgg/Tgg | 199 | Os04g0649100 | Heading date | Hd6 |
| 4 | 33073259 | C | T | SNP | Het | LOC_Os04g55560 | NON_SYNONYMOUS_CODING | R/W | Cgg/Tgg | 199 | Os04g0649100 | Heading date | Hd6 |
| 6 | 9337029 | C | G | SNP | Hom | LOC_Os06g16370 | NON_SYNONYMOUS_CODING | N/K | aaC/aaG | 165 | Os06g0275000 | Heading date | Hd1 |
| 11 | 7193692 | G | A | SNP | Hom | LOC_Os11g12740 | SYNONYMOUS_CODING | N/N | aaC/aaT | 623 | Os11g0235200 | Panicle length | SP1 |
| YR 13 |  |  |  |  |  |  |  |  |  |  |  |  |  |
| **Chrom** | **Position** | **Reference** | **Variant** | **Type** | **Zygosity** | **Gene_ID** | **Effect** | **old_AA/new_AA** | **Old_codon/New_codon** | **Codon_Num(CDS)** | **Genes** |  |  |
| 1 | 31556517 | G | T | SNP | Het | LOC_Os01g54860 | SYNONYMOUS_CODING | T/T | acC/acA | 22 | Os01g0752200 | Grain number | NOG1 |
| 1 | 36447526 | A | G | SNP | Het | LOC_Os01g62920 | SYNONYMOUS_CODING | L/L | Tta/Cta | 385 | Os01g0848400 | Seed shattering | qSH1 |
| 2 | 28863920 | C | A | SNP | Het | LOC_Os02g47280 | SYNONYMOUS_CODING | L/L | ctG/ctT | 326 | Os02g0701300 | Grain size | GS2 |
| 2 | 28863920 | C | A | SNP | Het | LOC_Os02g47280 | SYNONYMOUS_CODING | L/L | ctG/ctT | 298 | Os02g0701300 | Grain size | GS2 |
| 3 | 31566439 | A | G | SNP | Het | LOC_Os03g55490 | SYNONYMOUS_CODING | E/E | gaA/gaG | 110 | Os03g0762000 | Heading date | Hd6 |
| 3 | 31566439 | A | G | SNP | Het | LOC_Os03g55490 | SYNONYMOUS_CODING | E/E | gaA/gaG | 110 | Os03g0762000 | Heading date | Hd6 |
| 4 | 33073441 | G | A | SNP | Het | LOC_Os04g55560 | SYNONYMOUS_CODING | K/K | aaG/aaA | 226 | Os04g0649100 | Heading date | Hd6 |
| 4 | 33073441 | G | A | SNP | Het | LOC_Os04g55560 | SYNONYMOUS_CODING | K/K | aaG/aaA | 226 | Os04g0649100 | Heading date | Hd6 |
| 6 | 6652370 | G | A | SNP | Het | LOC_Os04g57530 | SYNONYMOUS_CODING | G/G | ggC/ggT | 103 | Os04g0670900 | Seed shattering | SH4 |
| 6 | 9337101 | C | T | SNP | Het | LOC_Os06g16370 | SYNONYMOUS_CODING | V/V | gtC/gtT | 189 | Os06g0275000 | Heading date | Hd1 |
| 6 | 9337148 | G | A | SNP | Hom | LOC_Os06g16370 | NON_SYNONYMOUS_CODING | R/Q | cGg/cAg | 205 | Os06g0275000 | Heading date | Hd1 |
| 6 | 9338330 | G | A | SNP | Het | LOC_Os06g16370 | NON_SYNONYMOUS_CODING | G/S | Ggt/Agt | 387 | Os06g0275000 | Heading date | Hd1 |
| 7 | 800963 | G | A | SNP | Het | LOC_Os07g02350 | SYNONYMOUS_CODING | I/I | atC/atT | 240 | Os07g0114400 | Phosphorus uptake | Pstol |
| YR 32 |  |  |  |  |  |  |  |  |  |  |  |  |  |
| **Chrom** | **Position** | **Reference** | **Variant** | **Type** | **Zygosity** | **Gene_ID** | **Effect** | **old_AA/new_AA** | **Old_codon/New_codon** | **Codon_Num(CDS)** | **Genes** |  |  |
| 1 | 31556517 | G | T | SNP | Het | LOC_Os01g54860 | SYNONYMOUS_CODING | T/T | acC/acA | 22 | Os01g0752200 | Grain number | NOG1 |
| 6 | 6649871 | T | G | SNP | Het | LOC_Os06g12310 | SYNONYMOUS_CODING | A/A | gcA/gcC | 201 | Os02g0745100 | Hull color | Lsi1 |
| 6 | 9338068 | A | C | SNP | Hom | LOC_Os06g16370 | NON_SYNONYMOUS_CODING | R/S | agA/agC | 299 | Os06g0275000 | Heading date | Hd1 |
| 7 | 800963 | G | A | SNP | Het | LOC_Os07g02350 | SYNONYMOUS_CODING | I/I | atC/atT | 240 | Os07g0114400 | Phosphorus uptake | Pstol |
| 8 | 20382857 | A | T | SNP | Het | LOC_Os08g32870 | NON_SYNONYMOUS_CODING | K/I | aAa/aTa | 244 | Os08g0424500 | Aroma | Badh2 |
| 11 | 7193921 | C | A | SNP | Hom | LOC_Os11g12740 | NON_SYNONYMOUS_CODING | G/V | gGc/gTc | 547 | Os11g0235200 | Panicle length | SP1 |
| 11 | 7193923 | G | A | SNP | Hom | LOC_Os11g12740 | SYNONYMOUS_CODING | D/D | gaC/gaT | 546 | Os11g0235200 | Panicle length | SP1 |
| 11 | 7193929 | C | G | SNP | Hom | LOC_Os11g12740 | SYNONYMOUS_CODING | S/S | tcG/tcC | 544 | Os11g0235200 | Panicle length | SP1 |
| 11 | 7194160 | T | C | SNP | Hom | LOC_Os11g12740 | SYNONYMOUS_CODING | A/A | gcA/gcG | 467 | Os11g0235200 | Panicle length | SP1 |


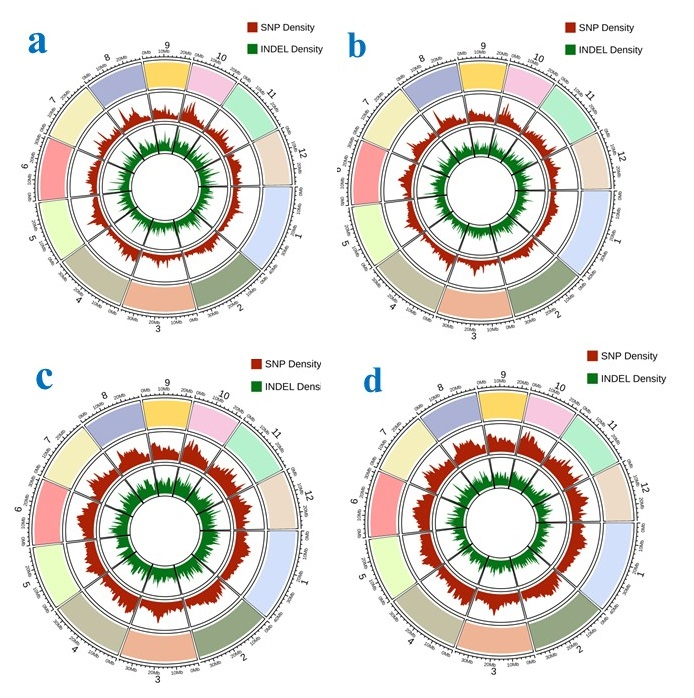


**Supplementary Figure 1.** An annotated Circos plot depicts the distribution pattern of SNP and InDel variants in rice lines. The outermost circle represents 12 chromosomes of the rice genome. The middle red circle represent the SNP density and innermost green circle represent the InDel density identified in the rice lines using whole genome sequencing data (a) Yamuna, (b) Wild rice, (c) YR13 and (d) YR32


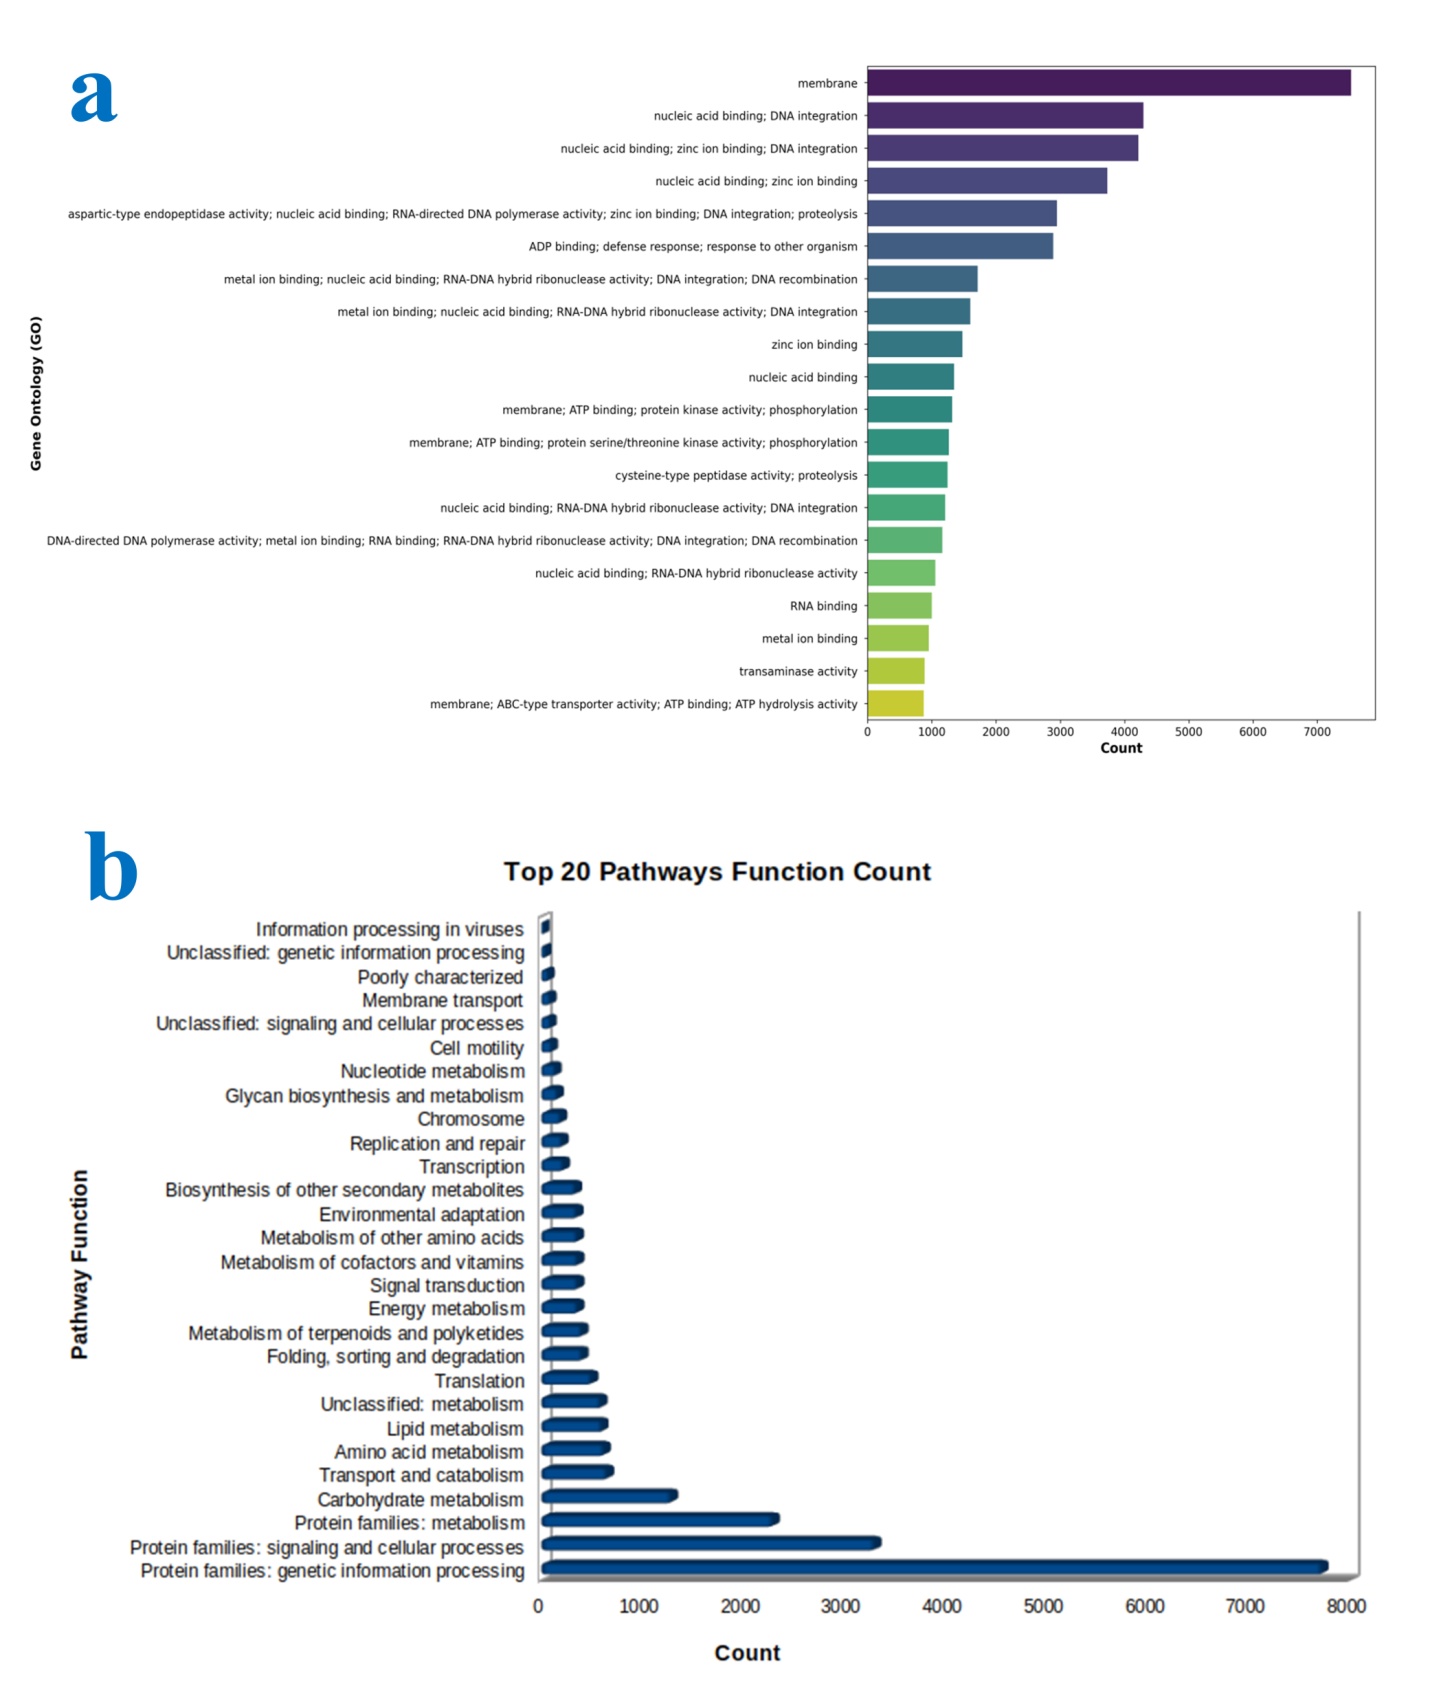


**Supplementary Figure 2.**Gene Ontology (GO) annotation and KEGG pathway mapping of Yamuna **a**: GO enrichment analysis for the differentially abundant proteins harboring large effect/nonsynonymous SNPs and InDels in the genes and **b**: Enrichment map of KEGG pathways in which the differentially abundant proteins participate.


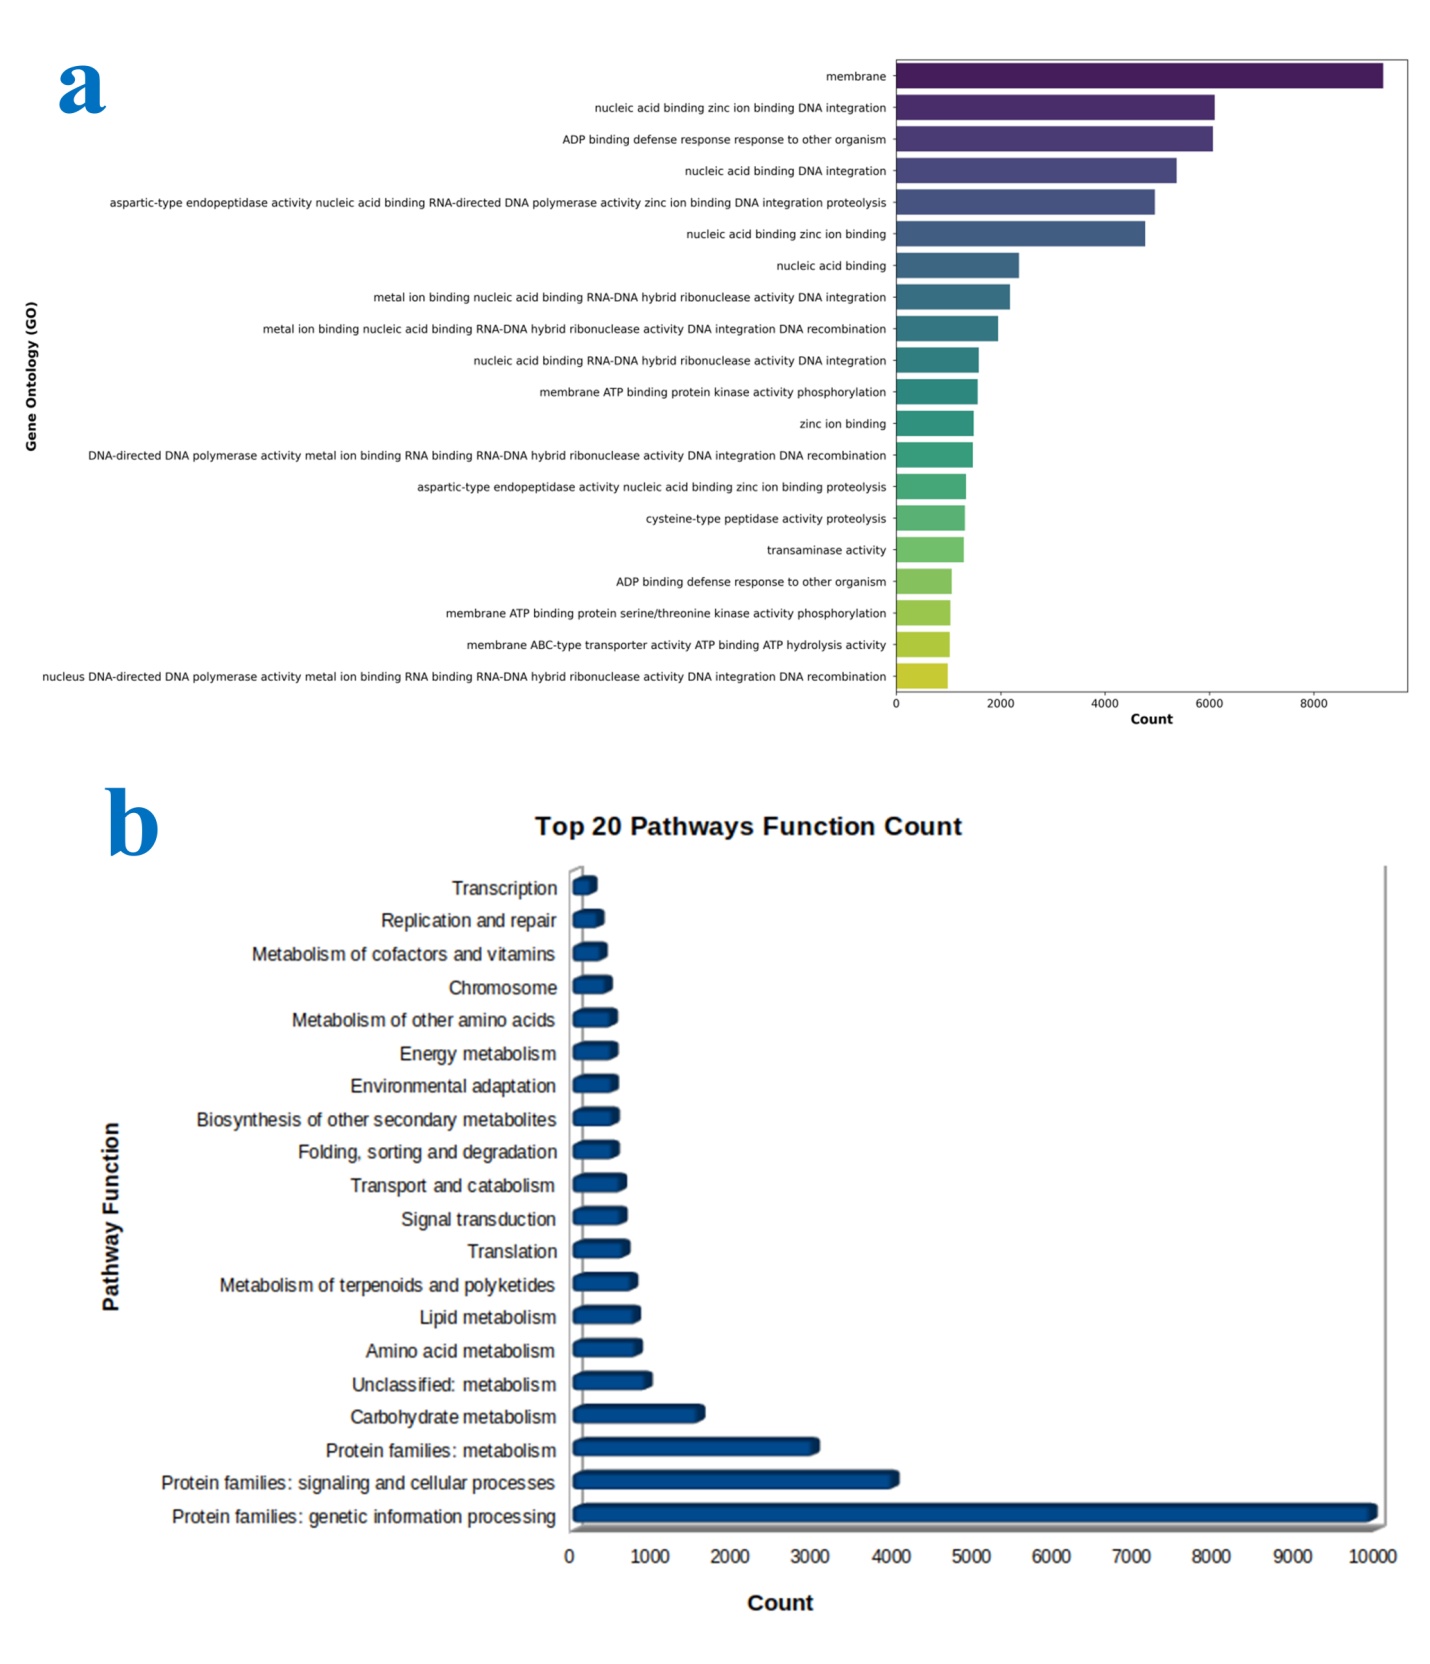


**Supplementary Figure 3.**Gene Ontology (GO) annotation and KEGG pathway mapping of Wild rice **a**: GO enrichment analysis for the differentially abundant proteins harboring large effect/nonsynonymous SNPs and InDels in the genes and **b**: Enrichment map of KEGG pathways in which the differentially abundant proteins participate.

**
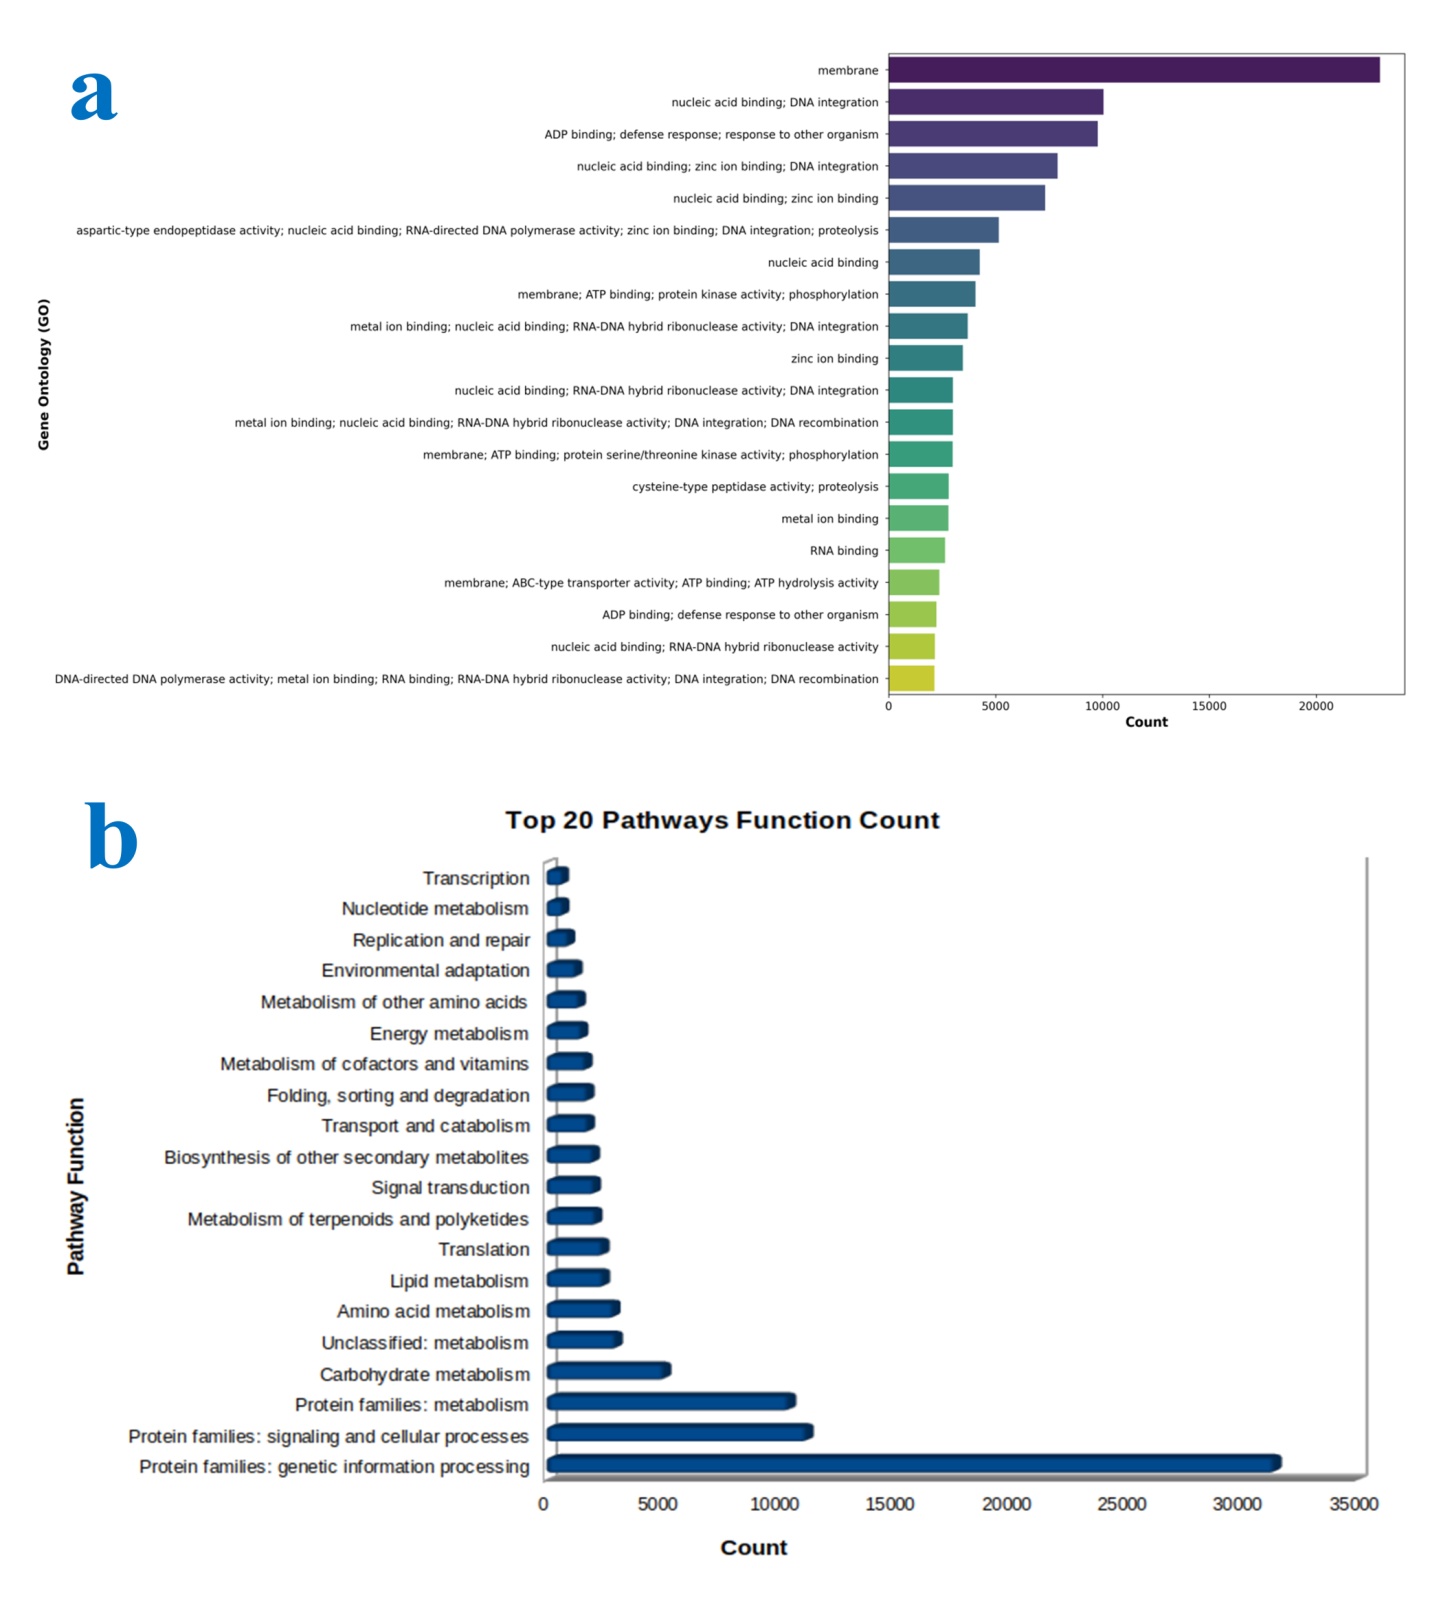
**

**Supplementary Figure 4.** Gene Ontology (GO) annotation and KEGG pathway mapping of breeding lines YR13 **a**: GO enrichment analysis for the differentially abundant proteins harboring large effect/nonsynonymous SNPs and InDels in the genes and **b**: Enrichment map of KEGG pathways in which the differentially abundant proteins participate.

**
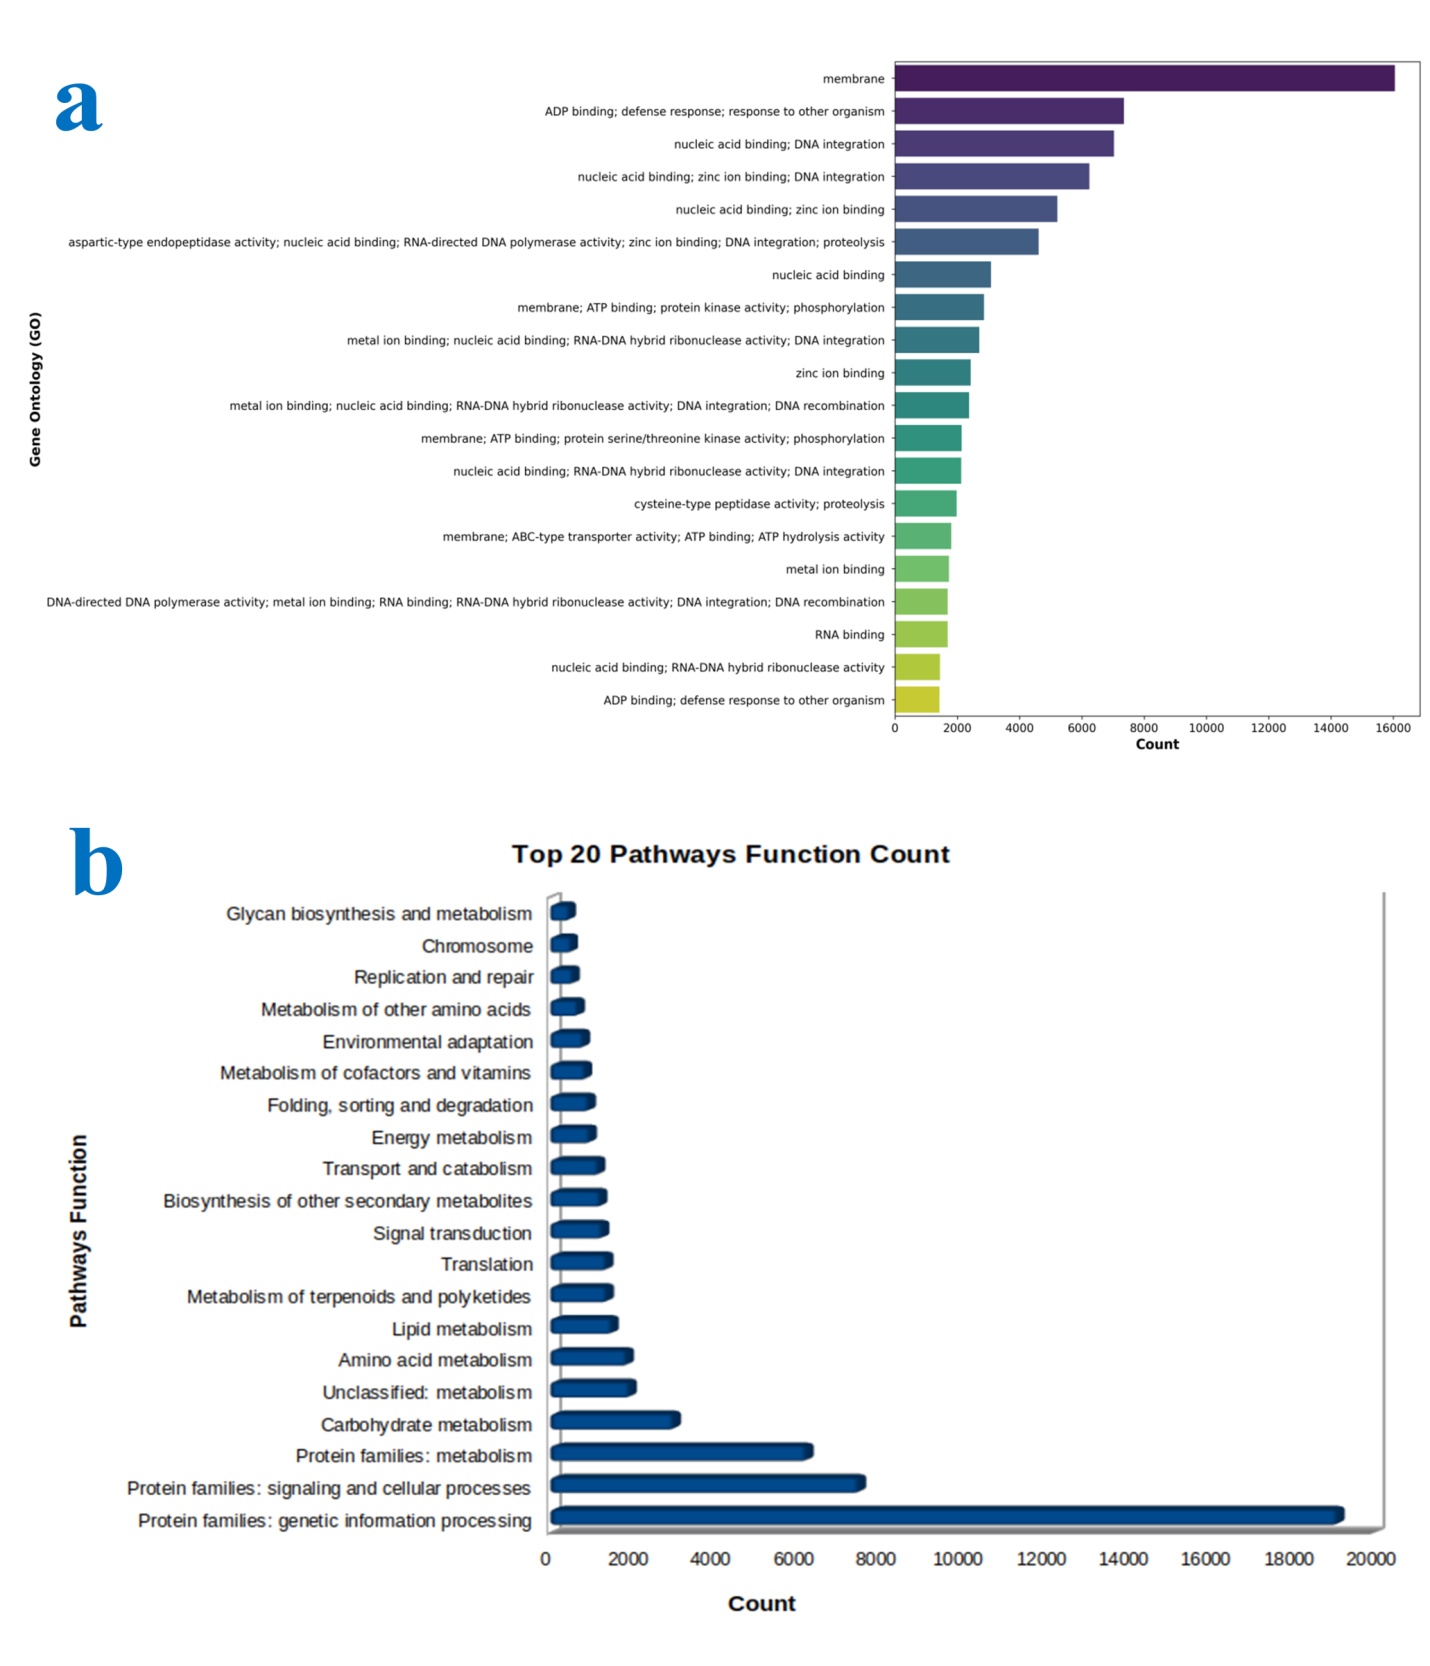
Supplementary Figure 5.** Gene Ontology (GO) annotation and KEGG pathway mapping of breeding lines YR32 **a**: GO enrichment analysis for the differentially abundant proteins harboring large effect/nonsynonymous SNPs and InDels in the genes and **b**: Enrichment map of KEGG pathways in which the differentially abundant proteins participate.
